# Supplementary material for: Feasibility and validity of using WHO adolescent job aid algorithms by health workers for reproductive morbidities among adolescent girls in rural North India
Source: Springer Nature journal article supplement (doi:10.1186/s12913-015-1067-x), 2015-06-01
Supplement: MOESM3 [file 9757712]

## मुझे मासिक धर्म के समय बहुत दर्द होता है :

| पूछें                                                                                                                                                                                                                                                                                                                                                                                                                                                                                                                 | देखें/महसूस/करें सुनें                                                                                                                                                                                                                                                                                                                                                                                                                                                                                                                                 | लक्षण                                                                                                                                                                                                                                                                                                                                                                                                             | वर्गीकरण                                                                                                                                                                               | प्रबन्धन                                                                                                                                                                                                                                                                                                                                                                                                                                                              |
|-----------------------------------------------------------------------------------------------------------------------------------------------------------------------------------------------------------------------------------------------------------------------------------------------------------------------------------------------------------------------------------------------------------------------------------------------------------------------------------------------------------------------|--------------------------------------------------------------------------------------------------------------------------------------------------------------------------------------------------------------------------------------------------------------------------------------------------------------------------------------------------------------------------------------------------------------------------------------------------------------------------------------------------------------------------------------------------------|-------------------------------------------------------------------------------------------------------------------------------------------------------------------------------------------------------------------------------------------------------------------------------------------------------------------------------------------------------------------------------------------------------------------|----------------------------------------------------------------------------------------------------------------------------------------------------------------------------------------|-----------------------------------------------------------------------------------------------------------------------------------------------------------------------------------------------------------------------------------------------------------------------------------------------------------------------------------------------------------------------------------------------------------------------------------------------------------------------|
| <p><b>दर्द</b></p> <ul style="list-style-type: none"> <li>क्या आपको पहले भी ऐसा दर्द हुआ है</li> <li>क्या यह दर्द सामान्यतः आपको मासिक धर्म के समय हुआ, या मासिक धर्म के बीच में</li> <li>क्या आपको अभी रक्तस्राव हो रहा है / क्या आपको अभी मासिक धर्म हो रहा है</li> <li>क्या अभी आपको दर्द हो रहा है</li> <li>मासिक धर्म जैसा है / या यह बहुत कम / बहुत ज्यादा है</li> </ul> <p>अगर शादी हुई हैं तो ( यौन रूप से सक्रिय हैं )</p>  | <p><b>पेट की जाँच</b></p> <ul style="list-style-type: none"> <li>निचले पेट में दर्द हैं</li> <li>क्या दर्द हल्का/थोड़ा ज्यादा/ बहुत ज्यादा है</li> </ul> <p><b>गर्भावस्था ( यौन रूप से सक्रिय हैं )</b><br/>अगर यौन रूप से सक्रिय हैं तो :</p> <ul style="list-style-type: none"> <li>गर्भनिरोध का प्रयोग सही ढंग से और लगातार नहीं करते</li> <li>या उसे मासिकधर्म देर से होता है</li> <li>या उसे गर्भावस्था के कोई लक्षण है</li> </ul> <p><b>गर्भावस्था के लक्षण देखें</b></p> <ul style="list-style-type: none"> <li>गर्भावस्था जाँच करें</li> </ul> | <p>अभी दर्द हैं और गर्भावस्था हो सकती हैं</p> <ul style="list-style-type: none"> <li>अगर यौन रूप से सक्रिय है तो</li> <li>अगर गर्भनिरोधक प्रयोग नहीं करती है तो</li> <li>मासिक देर से आया हैं और गर्भावस्था का कोई लक्षण हैं</li> </ul> <p>और</p> <ul style="list-style-type: none"> <li>अभी रक्तस्राव हो रहा है और रक्तस्राव सामान्य मासिक धर्म जैसा नहीं हैं</li> <li>दवाने से पेट में दर्द होता हैं</li> </ul> | <p><b>Possible threatened abortion/ectopic pregnancy संभावित गर्भपात / अस्थानिक गर्भावस्था</b></p>  | <p>Urgent referral to Medical Officer/Gynaecologist(स्त्री रोग विशेषज्ञ)</p>                                                                                                                                                                                                                                                                                                                                                                                          |
| <ul style="list-style-type: none"> <li>क्या आप गर्भ की रोकथाम के लिए कोई गर्भ निरोधक प्रयोग करती है</li> <li>आप कौन सा तरीका अपनाती है</li> <li>अगर मौखिक गर्भनिरोधक गोली का प्रयोग करती है तो : क्या आप कभी अपनी गोली लेना भुली है</li> <li>अगर कन्डोम प्रयोग करती है तो : क्या आप कन्डोम हर समय प्रयोग करती है जब भी सम्भोग करती है</li> </ul>                                                                                                                                                                      | <p><b>पेट की जाँच करें</b></p> <ul style="list-style-type: none"> <li>निचले पेट में दर्द हैं</li> <li>क्या दर्द हल्का/थोड़ा ज्यादा/ बहुत ज्यादा है</li> </ul> <p><b>और</b></p> <p>अगर शादी हुई हैं तो ( यौन रूप से सक्रिय हैं )</p> <p><b>गर्भावस्था का कोई लक्षण नहीं हैं</b></p>                                                                                                                                                                                                                                                                     | <ul style="list-style-type: none"> <li>अगर मासिक धर्म के पहले और बीच में दर्द होता हैं</li> <li>अगर अभी दर्द हैं</li> <li>दवाने से पेट में दर्द नहीं होता हैं</li> <li>अगर अभी रक्तस्राव हो रहा हैं</li> <li>रक्तस्राव सामान्य मासिक धर्म जैसा हैं</li> </ul> <p>और</p> <ul style="list-style-type: none"> <li>गर्भावस्था नहीं हो सकती हैं</li> </ul>                                                             | <p><b>Dysmenorrhoea</b></p>                                                                       | <p>Treat pain:<br/>Hot fomentation when she gets pain</p> <p>If this does not control pain, then it requires medications so refer to Medical Officer for initiation of treatment.</p> <p>Advise to take tablets as soon as pain begins<br/>Do not give for more than 7 days</p> <p>Advice her to continue with her daily activities</p> <p>Follow up:<br/>Follow up after 3 months</p> <p>If there is no improvement after 3 months then refer to Medical Officer</p> |

## मुझे मासिकधर्म के दौरान बहुत रक्तस्राव होता है :

| पूछें                                                                                                                                                                                                                                                                                                                                                                                                                                                                                                                                                          | देखें/महसूस/करें सुनें                                                                                                                                                                                                                                                                                                                                               | लक्षण                                                                                                                                                                                                                                                                                                                                                     | वर्गीकरण                                                                                           | प्रभन्दन                                                                                                                                                                                                                                                                        |
|----------------------------------------------------------------------------------------------------------------------------------------------------------------------------------------------------------------------------------------------------------------------------------------------------------------------------------------------------------------------------------------------------------------------------------------------------------------------------------------------------------------------------------------------------------------|----------------------------------------------------------------------------------------------------------------------------------------------------------------------------------------------------------------------------------------------------------------------------------------------------------------------------------------------------------------------|-----------------------------------------------------------------------------------------------------------------------------------------------------------------------------------------------------------------------------------------------------------------------------------------------------------------------------------------------------------|----------------------------------------------------------------------------------------------------|---------------------------------------------------------------------------------------------------------------------------------------------------------------------------------------------------------------------------------------------------------------------------------|
| <p><b>मासिक धर्म के समय</b></p> <ul style="list-style-type: none"> <li>क्या आपको अभी मासिकधर्म/रक्तस्राव हो रहा है</li> <li>आपको मासिकधर्म कितने दिनों में बंद हो जाता है</li> <li>मासिकधर्म के समय कितने सेनिटेरी नैपकिन/पैड/ रूई के पैड/ अन्य उपकरण प्रयोग हो जाते हैं</li> </ul> <p><b>अगर शादी हुई हैं तो</b> ( यौन रूप से सक्रिय हैं )</p> <ul style="list-style-type: none"> <li>क्या आप गर्भ की रोकथाम के लिए कोई गर्भनिरोधक प्रयोग करती है</li> <li>अगर हाँ तो आप कौन सा तरीका प्रयोग करती है</li> <li>अगर कापर टी का प्रयोग नहीं करती है :</li> </ul> | <p><b>गर्भावस्था</b></p> <p>अगर यौन रूप से सक्रिय है तो :</p> <ul style="list-style-type: none"> <li>गर्भनिरोधक का प्रयोग सही ढंग से और लगातार नहीं करते</li> <li>या उसको मासिकधर्म देर से होता है</li> <li>या उसको गर्भावस्था के कोई लक्षण है</li> </ul> <p><b>देखें</b></p> <p>नीचली पेट में वच्चेदानी को</p> <p><b>करे</b></p> <p>गर्भावस्था (पेशाब) की टेस्ट</p> | <p>अगर अभी मासिकधर्म/रक्तस्राव हो रहा है और गर्भावस्था और गर्भावस्था होने की संभावना हैं</p> <ul style="list-style-type: none"> <li>यौन रूप से सक्रिय है <ul style="list-style-type: none"> <li>गर्भनिरोधक का प्रयोग सही ढंग से और लगातार नहीं करते</li> <li>या उसको मासिकधर्म देर से होता है</li> <li>गर्भावस्था का कोई लक्षण हैं</li> </ul> </li> </ul> | <p><b>Possible threatened abortion/ectopic pregnancy संभाविक गर्भपात / अस्थानिक गर्भावस्था</b></p> | <p>Urgent referral to Medical Officer/Gynaecologist(स्त्री रोग विशेषज्ञ)</p>                                                                                                                                                                                                    |
| <p>↓</p> <ul style="list-style-type: none"> <li>अगर कांडोम प्रयोग करती है तो : क्या आप हर समय जब भी संभोग करती है कांडोम का प्रयोग करती है</li> <li>अगर मौखिक गर्भनिरोधक गोली का प्रयोग करती है तो : क्या आप कभी अपनी गोली लेना भूली है</li> </ul>                                                                                                                                                                                                                                                                                                             | <p><b>मासिकधर्म के दौरान अत्यधिक रक्तस्राव होता है और गर्भावस्था का कोई लक्षण नहीं हैं और खून की कमी (अनीमिया) का कोई लक्षण हैं</b></p> <p>जॉच के लिए</p> <ul style="list-style-type: none"> <li>हथेली का फीकापन</li> <li>ऑंख की निचली झिल्ली का फीकापन</li> </ul> <p>हीमोग्लोबिन टेस्ट करें</p>                                                                     | <ul style="list-style-type: none"> <li>अगर 7 से ज्यादा पैड को बदलना पडता है</li> <li>7 दिन से ज्यादा रक्तस्राव हो रहा है</li> <li>अनीमिया कि कोई लक्षण <ul style="list-style-type: none"> <li>हथेली का फीकापन</li> <li>ऑंख की निचली झिल्ली का फीकापन</li> </ul> </li> <li>हीमोग्लोबिन 12 से कम है</li> </ul>                                              | <p><b>Menorrhagia with anemia</b></p>                                                              | <p>For regulating bleeding Needs treatment so refer to Medical Officer for initiation of treatment</p> <p>Treat anaemia<br/>Iron -Folic acid tablets 200mg<br/>Start 1 tablet orally 3 times per day</p> <p>Treat for 3 months<br/>Follow up for drug supply after 3 months</p> |
| <p><b>गर्भावस्था</b></p> <ul style="list-style-type: none"> <li>क्या आपका एक मासिकधर्म छूट गया या आपको मासिक धर्म देर से हुआ</li> <li>क्या आपको निम्न में से कोई लक्षण है : <ul style="list-style-type: none"> <li>सुबह मिचली / उल्टी</li> <li>स्तन में भारीपन या दर्द</li> </ul> </li> </ul>                                                                                                                                                                                                                                                                  | <p><b>मासिकधर्म के दौरान अत्यधिक रक्तस्राव होता है और खून की कमी (अनीमिया) का कोई लक्षण नहीं हैं</b></p>                                                                                                                                                                                                                                                             | <ul style="list-style-type: none"> <li>अगर 7 से ज्यादा पैड को बदलना पडता है</li> <li>7 दिन से ज्यादा रक्तस्राव हो रहा है</li> <li>अनीमिया कि कोई लक्षण नहीं हैं</li> <li>हीमोग्लोबिन 12 से ऊपर हैं</li> <li>कांपर टी का इस्तेमाल नहीं कर रही हैं</li> </ul>                                                                                               | <p><b>Menorrhagia with no anemia</b></p>                                                           | <p>Regulate bleeding (as above) AND Prevent anaemia<br/>Iron -Folic acid tablets 200mg<br/>1 tablet orally 1 time per day</p> <p>Treat for 3 months<br/>Review after 3 cycles</p>                                                                                               |
| <p><b>खून की कमी (अनीमिया)</b></p> <ul style="list-style-type: none"> <li>क्या आप हर समय थका हुआ महसूस करती है</li> </ul>                                                                                                                                                                                                                                                                                                                                                                                                                                      | <p><b>मासिकधर्म के दौरान अत्यधिक रक्तस्राव होता है और गर्भावस्था का कोई लक्षण नहीं हैं और</b></p> <p>अगर कांपर टी का प्रयोग करती हैं तो</p>                                                                                                                                                                                                                          | <ul style="list-style-type: none"> <li>अगर 7 से ज्यादा बार पैड को बदलना पडता है</li> <li>7 दिन से ज्यादा रक्तस्राव हो रहा है और</li> <li>कांपर टी का इस्तेमाल कर रही हैं</li> </ul>                                                                                                                                                                       | <p><b>Menorrhagia possibly associated with contraception method (Copper T)</b></p>                 | <p>Regulate bleeding (as above)<br/>Treat/ Prevent anaemia (as above)</p> <p>After 3 months if heavy bleeding continues discuss the removal of Copper T and starting alternative methods</p>                                                                                    |

## मुझे अनियमित मासिकधर्म होता है मेरा मासिकधर्म बंद हो गया है

| पूछें                                                                                                                                                                                                                                                                                                                                                                                                                                                                                                                                                                                                                                                                                                                                                                                                                                                                                                                                                                                                                                                                                                                                                                                                                              | देखें/महसूस/करें सुनें                                                                                                                                                                                                                                                                                                                          | लक्षण                                                                                                                                                                                                                                                                                                                                                                                                                                                                                                                                                                                                                                                                                                                                                                                                                                                                                                                                                                                                                                    | वर्गीकरण                                                                                                                                                                                                                                                                                                                                                                            | प्रभन्दन                                                                                                                                                                                                                                                                                                                                                                                                                                                                                                                                                                                                                      |
|------------------------------------------------------------------------------------------------------------------------------------------------------------------------------------------------------------------------------------------------------------------------------------------------------------------------------------------------------------------------------------------------------------------------------------------------------------------------------------------------------------------------------------------------------------------------------------------------------------------------------------------------------------------------------------------------------------------------------------------------------------------------------------------------------------------------------------------------------------------------------------------------------------------------------------------------------------------------------------------------------------------------------------------------------------------------------------------------------------------------------------------------------------------------------------------------------------------------------------|-------------------------------------------------------------------------------------------------------------------------------------------------------------------------------------------------------------------------------------------------------------------------------------------------------------------------------------------------|------------------------------------------------------------------------------------------------------------------------------------------------------------------------------------------------------------------------------------------------------------------------------------------------------------------------------------------------------------------------------------------------------------------------------------------------------------------------------------------------------------------------------------------------------------------------------------------------------------------------------------------------------------------------------------------------------------------------------------------------------------------------------------------------------------------------------------------------------------------------------------------------------------------------------------------------------------------------------------------------------------------------------------------|-------------------------------------------------------------------------------------------------------------------------------------------------------------------------------------------------------------------------------------------------------------------------------------------------------------------------------------------------------------------------------------|-------------------------------------------------------------------------------------------------------------------------------------------------------------------------------------------------------------------------------------------------------------------------------------------------------------------------------------------------------------------------------------------------------------------------------------------------------------------------------------------------------------------------------------------------------------------------------------------------------------------------------|
| <p><b>अनियमित मासिकधर्म</b></p> <ul style="list-style-type: none"> <li>आप कितने साल की थी जब आपको मासिकधर्म शुरू हुआ</li> <li>क्या आपका मासिकधर्म सामान्यतः नियमित है (क्या यह हर महीने उसी समय पर आता है)</li> <li>अगर महीना अनियमित हैं तो यह कब से अनियमित हैं</li> <li>यह कितने दिन तक होता है</li> <li>क्या आपको मासिकधर्म के बीच में दाग या रक्तस्राव होता है? क्या यह अकसर आता है?</li> </ul> <p><b>अगर शादी हुई हैं तो (यौन रूप से सक्रिय हैं)</b></p> <ul style="list-style-type: none"> <li>क्या अगर आप पिचले 6 महीने में या अभी कोई गर्भनिरोधक का इस्तेमाल कर रहा है</li> <li>यदि अभी इस्तेमाल कर रहे हो : कौन सा तरीका इस्तेमाल कर रहे हो</li> <li>अगर गर्भनिरोध के लिए कंडोम प्रयोग करती है तो : क्या आप हर समय जब भी संभोग करती है कंडोम का प्रयोग करती है</li> <li>अगर मौखिक गर्भनिरोधक गोली का प्रयोग करती है तो : क्या आप कभी अपनी गोली लेना भूली है</li> </ul> <p><b>गर्भावस्था</b></p> <ul style="list-style-type: none"> <li>क्या आप यह सोचती है कि आप गर्भवती हो सकती है</li> <li>क्या आपका एक मासिकधर्म छूट गया या आपको मासिक धर्म देर से हुआ</li> <li>क्या आपको निम्न में से कोई लक्षण है : <ul style="list-style-type: none"> <li>सुबह मिचली / उल्टी</li> <li>स्तन में सूजन या दर्द</li> </ul> </li> </ul> | <p><b>अगर यौन रूप से सक्रिय है तो :</b></p> <ul style="list-style-type: none"> <li>गर्भनिरोध का प्रयोग सही ढंग से और लगातार नहीं करते हैं</li> <li>या उसको मासिकधर्म देर से होता है</li> <li>या उसको गर्भावस्था के कोई लक्षण है</li> </ul> <p><b>देखें</b><br/>नीचली पेट में बच्चेदानी को</p> <p><b>करे</b><br/>गर्भावस्था (पेशाब) की टेस्ट</p> | <p>अगर अभी मासिकधर्म/रक्तस्राव हो रहा है और गर्भावस्था और गर्भावस्था होने की संभावना हैं</p> <ul style="list-style-type: none"> <li>यौन रूप से सक्रिय है <ul style="list-style-type: none"> <li>गर्भनिरोध का प्रयोग सही ढंग से और लगातार नहीं करते</li> <li>या उसको मासिकधर्म देर से होता है</li> <li>गर्भावस्था का कोई लक्षण हैं</li> </ul> </li> </ul> <p>अगर पहला मासिकधर्म 2 साल पहले हुआ था अनियमित मासिकधर्म</p> <ul style="list-style-type: none"> <li>पिचले 3 महीनों से कोई मासिक धर्म नहीं आया</li> <li>मासिकधर्म का चक्र 21 दिन से कम है या 35 दिन से ज्यादा हैं</li> <li>दोनों मासिकधर्म के बीच का अन्तराल 20 दिन से ज्यादा बदलता रहता हैं</li> <li>मासिकधर्म के बीच में दाग या रक्तस्राव होता है और हारमोनल गर्भनिरोध का इस्तेमाल नहीं करती हैं</li> </ul> <p>अनियमित मासिकधर्म (ऊपर बताया गया) और</p> <p>पिचले 6 महीने में या अभी हारमोनल गर्भनिरोध का इस्तेमाल कर रही हैं</p> <ul style="list-style-type: none"> <li>माला एन्</li> </ul> <p>अगर पहला मासिकधर्म 2 साल में हुआ था अनियमित मासिकधर्म जैसे (ऊपर बताया गया)</p> | <p><b>Possible threatened abortion</b><br/><b>OR</b><br/><b>Possible ectopic pregnancy</b><br/><b>संभावित गर्भपात / अस्थानिक गर्भावस्था</b></p> <p><b>Irregular periods</b><br/><b>Not associated with hormonal contraceptives</b></p> <p><b>Irregular periods</b><br/><b>Associated with hormonal contraceptives</b></p> <p><b>Menstrual irregularity of early adolescents</b></p> | <p>Urgent referral to Medical Officer/Gynaecologist(स्त्री रोग विशेषज्ञ)</p> <p>Refer to Medical Officer/ Gynaecologist(स्त्री रोग विशेषज्ञ)</p> <p>If using OCPs* and not taking it regularly Advice her to use alternative methods like condom until she has been taking OCPs regularly for atleast 7 days</p> <p>If taking OCPs regularly If this is less than 4 months advice her that irregular bleeding is common during this period</p> <p>If taking OCPs for more than 4 months then refer</p> <p>Reassure that irregular bleeding is common in first 2 years and periods are likely to become regular with time.</p> |

\*OCP- Oral contraceptive pills like Mala N, Mala D

## यौवन अवस्था में देरी

| पूछें                                                                                                                                                                                                                                                                                                                                                                                                                                                                                                                                                                                                                                                                                                                                                                                                                                                                                                                                                                                                                  | देखें/महसूस/करें सुनें                                                                                                                                                                                                                                                                                                                                                                                                                                                                                                                                                                                                                                                                 | लक्षण                                                                                                                                                                                                                                                                                                                                                                                                           | वर्गीकरण                                                                                                                                                                                      | प्रभन्दन                                                                                                                                                                                                                                                                                                                                |
|------------------------------------------------------------------------------------------------------------------------------------------------------------------------------------------------------------------------------------------------------------------------------------------------------------------------------------------------------------------------------------------------------------------------------------------------------------------------------------------------------------------------------------------------------------------------------------------------------------------------------------------------------------------------------------------------------------------------------------------------------------------------------------------------------------------------------------------------------------------------------------------------------------------------------------------------------------------------------------------------------------------------|----------------------------------------------------------------------------------------------------------------------------------------------------------------------------------------------------------------------------------------------------------------------------------------------------------------------------------------------------------------------------------------------------------------------------------------------------------------------------------------------------------------------------------------------------------------------------------------------------------------------------------------------------------------------------------------|-----------------------------------------------------------------------------------------------------------------------------------------------------------------------------------------------------------------------------------------------------------------------------------------------------------------------------------------------------------------------------------------------------------------|-----------------------------------------------------------------------------------------------------------------------------------------------------------------------------------------------|-----------------------------------------------------------------------------------------------------------------------------------------------------------------------------------------------------------------------------------------------------------------------------------------------------------------------------------------|
| <ul style="list-style-type: none"> <li>आप कितने वर्ष की है?</li> </ul> <p><b>स्तन (वक्ष) विकास</b></p> <ul style="list-style-type: none"> <li>क्या आपने अपने स्तन के आकार में कोई परिवर्तन देखा है?</li> <li>अगर स्तन विकास शुरू हुआ तो</li> <li>आप कितने वर्ष की थी जब आपने यह परिवर्तन देखा था?</li> </ul> <p><b>Pubic hair* (जघन बाल)</b></p> <ul style="list-style-type: none"> <li>क्या आपके शरीर में जननांगों के पास बाल उगे?</li> <li>अगर जघन बाल है तो :</li> <li>आप कितने साल की थी जब आपने यह खयाल किया?</li> </ul> <p><b>मासिक धर्म (महिना)</b></p> <ul style="list-style-type: none"> <li>क्या आपको मासिक धर्म (महिना) शुरू हो गया है?</li> <li>अगर मासिक धर्म (महिना) शुरू हो गया है तो :</li> <li>आप कितने साल की थी जब आपको पहला मासिक धर्म शुरू हुआ</li> </ul> <p><b>दीर्घस्थायी बीमारी</b></p> <ul style="list-style-type: none"> <li>क्या आपको कोई पुरानी (लंबे समय से) बीमारी है</li> </ul> <p>(नोट: अगर लंबे समय से चल रही बीमारी के कोई लक्षण जैसे : बुखार, खांसी, दस्त, वजन कम होना इत्यादि)</p> | <p>जाँच करना</p> <ul style="list-style-type: none"> <li>वजन</li> <li>लंबाई</li> </ul> <p>गणना करना</p> <ul style="list-style-type: none"> <li><math>BMI^{\#} = \text{वजन} / \text{लंबाई}^2 \times \text{लंबाई}</math></li> </ul> <p>जाँच</p> <ul style="list-style-type: none"> <li>स्तन = स्तन tissue की उपस्थिति एवम् चूचुक (nipple) के आस पास का रंग और आकार</li> <li>Presence of pubic hair</li> </ul> <p>जाँच करें</p> <ul style="list-style-type: none"> <li>आगर लम्बे समय से बुखार, खांसी, दस्त, वजन का घटना इत्यादि हैं                     <ul style="list-style-type: none"> <li>हथेली का फीकापन</li> <li>ऑख की निचली झिल्ली का फीकापन</li> <li>बुखार</li> </ul> </li> </ul> | <ul style="list-style-type: none"> <li>14 वर्ष की उम्र तक स्तन का विकास न होना।</li> <li>14 वर्ष की उम्र तक <i>Pubic hair</i></li> <li>16 वर्ष की उम्र तक महिना न होना।</li> <li>5 साल से ज्यादा समय बीत गया जब स्तन विकास का पहला लक्षण दिखा परन्तु अभी तक पहला महिना नहीं आया।</li> </ul> <p>और</p> <ul style="list-style-type: none"> <li>पोषण की कमी</li> <li>दीर्घस्थायी बीमारी के लक्षण</li> </ul>        | <p><b>यौवन अवस्था में देरी</b></p> <p>Possibly due to chronic illness<br/>OR<br/>Undernutrition</p>        | <ul style="list-style-type: none"> <li>Refer to Medical officer</li> <li>Address nutritional problems</li> <li>Review after 6 months for assessment of pubertal development</li> </ul>                                                                                                                                                  |
|                                                                                                                                                                                                                                                                                                                                                                                                                                                                                                                                                                                                                                                                                                                                                                                                                                                                                                                                                                                                                        |                                                                                                                                                                                                                                                                                                                                                                                                                                                                                                                                                                                                                                                                                        | <ul style="list-style-type: none"> <li>14 वर्ष की उम्र तक स्तन का विकास न होना।</li> <li>14 वर्ष की उम्र तक <i>Pubic hair</i></li> <li>16 वर्ष की उम्र तक महिना न होना।</li> <li>5 साल से ज्यादा समय बीत गया जब स्तन विकास का पहला लक्षण दिखा परन्तु अभी तक पहला महिना नहीं आया।</li> </ul> <p>और</p> <ul style="list-style-type: none"> <li>पोषण की कमी और पुरानी बीमारी के लक्षण नहीं हैं</li> </ul>          | <p><b>यौवन अवस्था में देरी</b></p> <p>Unlikely to be due to chronic illness<br/>OR<br/>Undernutrition</p>  | <ul style="list-style-type: none"> <li>Advice her that pubertal development is delayed for her age</li> <li>Refer to Medical Officer</li> <li>Reassure that even though puberty is delayed, most girls will eventually go through puberty, Stress that a small number do not and that is why she needs to be checked further</li> </ul> |
|                                                                                                                                                                                                                                                                                                                                                                                                                                                                                                                                                                                                                                                                                                                                                                                                                                                                                                                                                                                                                        |                                                                                                                                                                                                                                                                                                                                                                                                                                                                                                                                                                                                                                                                                        | <ul style="list-style-type: none"> <li>13 साल की है या छोटी है</li> <li>अगर 14 साल या उस से बड़ी है तो स्तन विकास शुरू हो गया।</li> <li>अगर 14 साल या उस से बड़ी है तो <i>Pubic hair</i> है।</li> <li>अगर 16 साल या उस से बड़ी है तो महिना शुरू हो गया।</li> </ul> <p>और</p> <ul style="list-style-type: none"> <li>5 साल से कम समय बीत गया जब स्तन विकास का पहला लक्षण दिखा और उससे पहला महिना आया।</li> </ul> | <p><b>Normal</b></p>                                                                                     | <ul style="list-style-type: none"> <li>Reassure that even if the signs of pubertal development have not appeared, she is within normal limits for age</li> <li>Reassure that most girls will eventually develop and go through puberty</li> </ul>                                                                                       |

\* Pubic hair: बाहरीय जननांग के पास बाल होना

<sup>#</sup>BMI: Body mass index. प्रशिक्षण पुस्तिका के अनुबन्ध को देखिये

## मुझे मेरी जननेन्द्रिय (गुप्तांग/योनि) से असाधारण ज्वलनशील अथवा खुजली वाला स्राव होता है

| पूछें                                                                                                                                                                                                                                                                                                                                                                                                                                                                                                                                                                                                                                                                                                                                                                                                                                                                                                                                                                            | देखें/महसूस/करें सुनें                                                                                                                                                                                       | लक्षण                                                                                                                                                                                                                                                                                                                                                                                                                                                                                                              | वर्गीकरण                                                                                                                                                                                            | प्रभन्दन                                                                                                                                                                                                                                                         |
|----------------------------------------------------------------------------------------------------------------------------------------------------------------------------------------------------------------------------------------------------------------------------------------------------------------------------------------------------------------------------------------------------------------------------------------------------------------------------------------------------------------------------------------------------------------------------------------------------------------------------------------------------------------------------------------------------------------------------------------------------------------------------------------------------------------------------------------------------------------------------------------------------------------------------------------------------------------------------------|--------------------------------------------------------------------------------------------------------------------------------------------------------------------------------------------------------------|--------------------------------------------------------------------------------------------------------------------------------------------------------------------------------------------------------------------------------------------------------------------------------------------------------------------------------------------------------------------------------------------------------------------------------------------------------------------------------------------------------------------|-----------------------------------------------------------------------------------------------------------------------------------------------------------------------------------------------------|------------------------------------------------------------------------------------------------------------------------------------------------------------------------------------------------------------------------------------------------------------------|
| <p><b>योनि से स्राव</b><br/>क्या आप अपने स्राव की प्रकार के वारों में वताएंगी ?</p> <ul style="list-style-type: none"> <li>• <b>रंग</b> : क्या स्राव/साफ सफेद/हरा/भूरा/पीला था</li> <li>• <b>स्थिरता</b> : क्या स्राव पतला या गाढा था</li> <li>• <b>दुर्गंध</b> : क्या स्राव में दुर्गंध थी</li> <li>• <b>खुजली या जलन</b> : क्या आपको जननेन्द्रियों (गुप्तांग/योनि) में खुजली या जलन होती है।</li> <li>• <b>निचले पेट में दर्द</b> : क्या आपको निचले पेट में दर्द होता है                             <ul style="list-style-type: none"> <li>— अगर पेट में दर्द है तो देखे</li> <li>— हाल ही में प्रसव</li> <li>— असामान्य योनि स्राव</li> </ul> </li> </ul> <p><b>अगर शादी हुई है तो</b> ( यौन रूप से सक्रिय हैं )</p> <p>क्या आपको कोई और जननेन्द्रिय संबंधी समस्या है</p> <ul style="list-style-type: none"> <li>• क्या आपको पेट और जाँघ के बीच के भाग में सुजन है</li> <li>• पति को कोई जननेन्द्रिय संबंधी समस्या है</li> <li>• मूत्रत्याग में दर्द होना (पुरुष)</li> </ul> | <p><b>पेट की जाँच</b></p> <ul style="list-style-type: none"> <li>• निचले पेट में दर्द है</li> <li>• क्या दर्द हल्का/थोड़ा ज्यादा/बहुत ज्यादा है</li> </ul> <p>सामान्य शरीरिक जांच (पहले उल्लेख किया गया)</p> | <p>असामान्य योनि स्राव है :</p> <ul style="list-style-type: none"> <li>• <b>रंग</b> : अगर स्राव सफेद/हरा/ भूरा/पीला है</li> <li>• <b>स्थिरता</b> : अगर स्राव गाढा है</li> <li>• <b>दुर्गंध</b> : अगर स्राव में दुर्गंध है</li> <li>• <b>खुजली या जलन</b> : अगर जननेन्द्रियों (गुप्तांग/योनि) में खुजली या जलन है</li> </ul> <p>और</p> <ul style="list-style-type: none"> <li>• निचले पेट में दर्द नहीं है</li> </ul>                                                                                               | <p><b>Reproductive tract infections (RTIs)</b></p>                                                               | <p>Refer to Medical Officer</p> <p>Advice about completion of course of medications</p> <p>Stress the importance of genital and menstrual hygiene</p>                                                                                                            |
|                                                                                                                                                                                                                                                                                                                                                                                                                                                                                                                                                                                                                                                                                                                                                                                                                                                                                                                                                                                  |                                                                                                                                                                                                              | <p>असामान्य योनि स्राव है :</p> <ul style="list-style-type: none"> <li>• <b>रंग</b> : अगर स्राव सफेद/हरा/ भूरा/पीला है</li> <li>• <b>स्थिरता</b> : अगर स्राव गाढा है</li> <li>• <b>दुर्गंध</b> : अगर स्राव में दुर्गंध है</li> <li>• <b>खुजली या जलन</b> : अगर जननेन्द्रियों (गुप्तांग/योनि) में खुजली या जलन है</li> </ul> <p>और</p> <ul style="list-style-type: none"> <li>• निचले पेट में दर्द नहीं है</li> </ul> <p>और</p> <p>गोनोरिया (Gonorrhoea) या क्लैमिडिया (Chlamydia) या कोई STI* होने कि आशंका है</p> | <p><b>Pelvic inflammatory disease(PID)</b></p> <p><b>OR</b></p> <p><b>Sexually transmitted disease(STI)</b></p>  | <p>Refer to Medical Officer</p> <p>Advice about completion of course of medications</p> <p>Stress the importance of genital and menstrual hygiene</p> <p>In married couples encourage consistent use of condoms(<i>Nirodh</i>)</p> <p>Follow up after 1 week</p> |
|                                                                                                                                                                                                                                                                                                                                                                                                                                                                                                                                                                                                                                                                                                                                                                                                                                                                                                                                                                                  |                                                                                                                                                                                                              | <p>सामान्य योनि स्राव है :</p> <ul style="list-style-type: none"> <li>• स्पष्ट है</li> <li>• पतला है</li> <li>• कोई बदबू नहीं है</li> <li>• माहवारी चक्र के बीच में स्राव को थोड़ा गाढा या विपचिपा होती है</li> </ul>                                                                                                                                                                                                                                                                                              | <p><b>Normal</b></p>                                                                                           | <p>Reassure that this is normal vaginal discharge</p> <p>Advice the girl about maintaining genital hygiene</p>                                                                                                                                                   |

\*STI- Sexually transmitted infections (यौन संक्रमण).

PID- Infection of Uterus, Fallopian tube, Ovaries etc. Most common cause is STI.
